# Supplementary material
Source: Springer Nature journal article supplement (https://www.springermedizin.de/resource/supplementary/12885_2009_1736_MOESM5_ESM.pdf/9472812)

**A**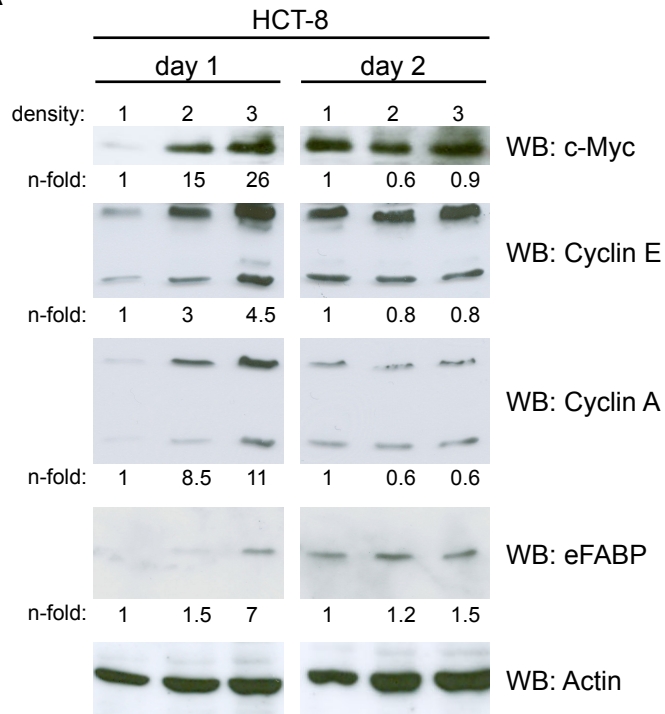**B**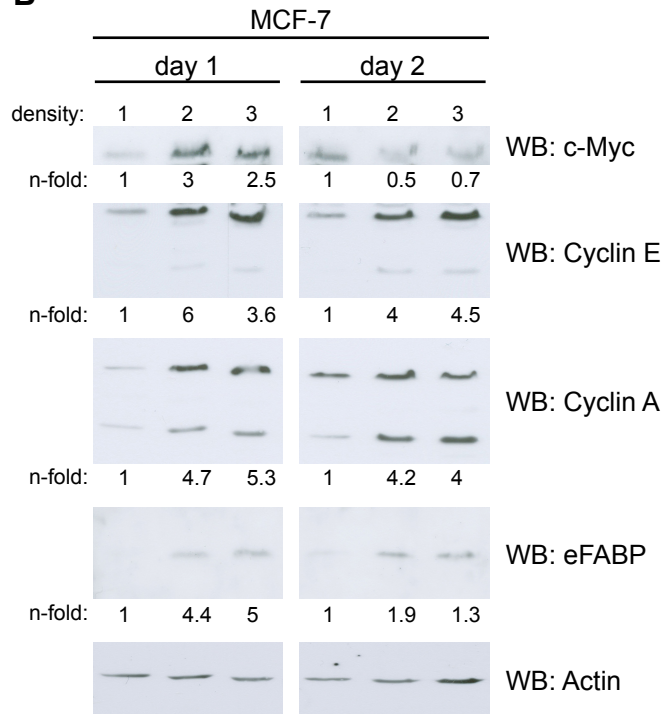

Supplement: MOESM5 [file 9472812]
